# Supplementary material
Source: MDPI journal article supplement (https://www.mdpi.com/2073-4344/11/8/991)
Supplement: s1 [file s1 › catalysts-1327040-supplementary.pdf]

---

# First-principles study of electronic and optical properties of two-dimensional WSe/BSe van der Waals heterostructure with high solar-to-hydrogen efficiency

Zhengyang Zhu<sup>1</sup>, Kai Ren<sup>2,\*</sup>, Huabing Shu<sup>3</sup>, Zhen Cui<sup>4</sup>, Zhaoming Huang<sup>1,\*</sup>, Jin Yu<sup>5</sup> and Yujing Xu<sup>2</sup>

<sup>1</sup>School of Mechanical Engineering, Wanjiang University of Technology, Maanshan, Anhui, China

<sup>2</sup>School of Mechanical and Electronic Engineering, Nanjing Forestry University, Nanjing, Jiangsu, China

<sup>3</sup>School of Science, Jiangsu University of Science and Technology, Zhenjiang 212001, China

<sup>4</sup>School of Automation and Information Engineering, Xi'an University of Technology, Xi'an, Shaanxi 710048, China

<sup>5</sup>School of Materials Science and Engineering, Southeast University, Nanjing, Jiangsu, China

E-mail: kairen@njfu.edu.cn (Kai Ren), jimmymacy@163.com (Zhaoming Huang)

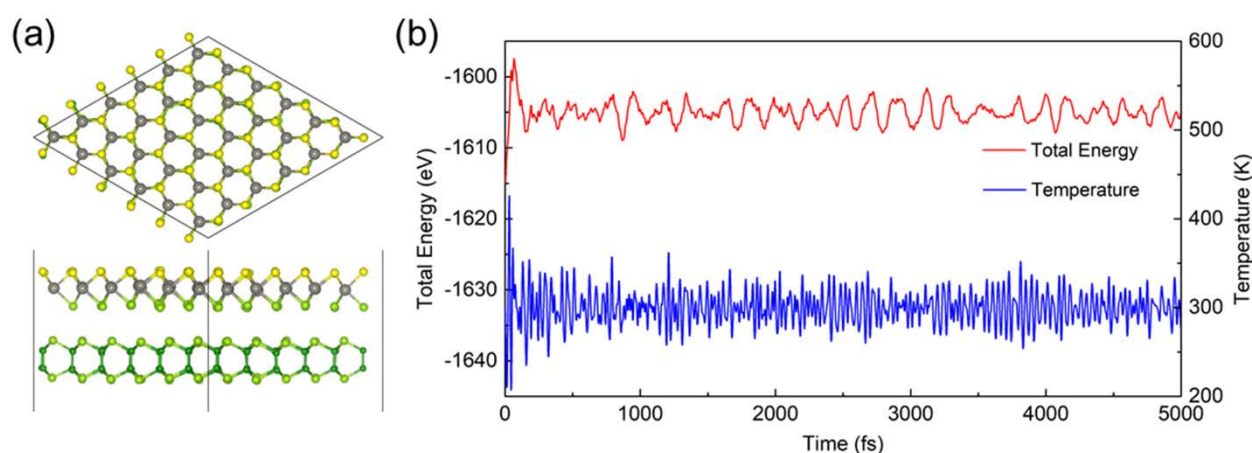

**Figure. S1** (a) The AIMD snapshots for WSe/BSe vdW heterostructure with  $\gamma$ -8 stacking style; (b) the total energy and temperature fluctuations during AIMD simulations for WSe/BSe heterostructure with  $\gamma$ -8 stacking style.
